# Supplementary material for: Myeloid - derived suppressor cells in Type 1 diabetes are an expanded population exhibiting diverse T-cell suppressor mechanisms
Source: PubMed Central journal article supplement (PMC7673497; doi:10.1371/journal.pone.0242092), 2020-11-18
Supplement: pone.0242092.s001.pdf [file pone.0242092.s001.pdf]

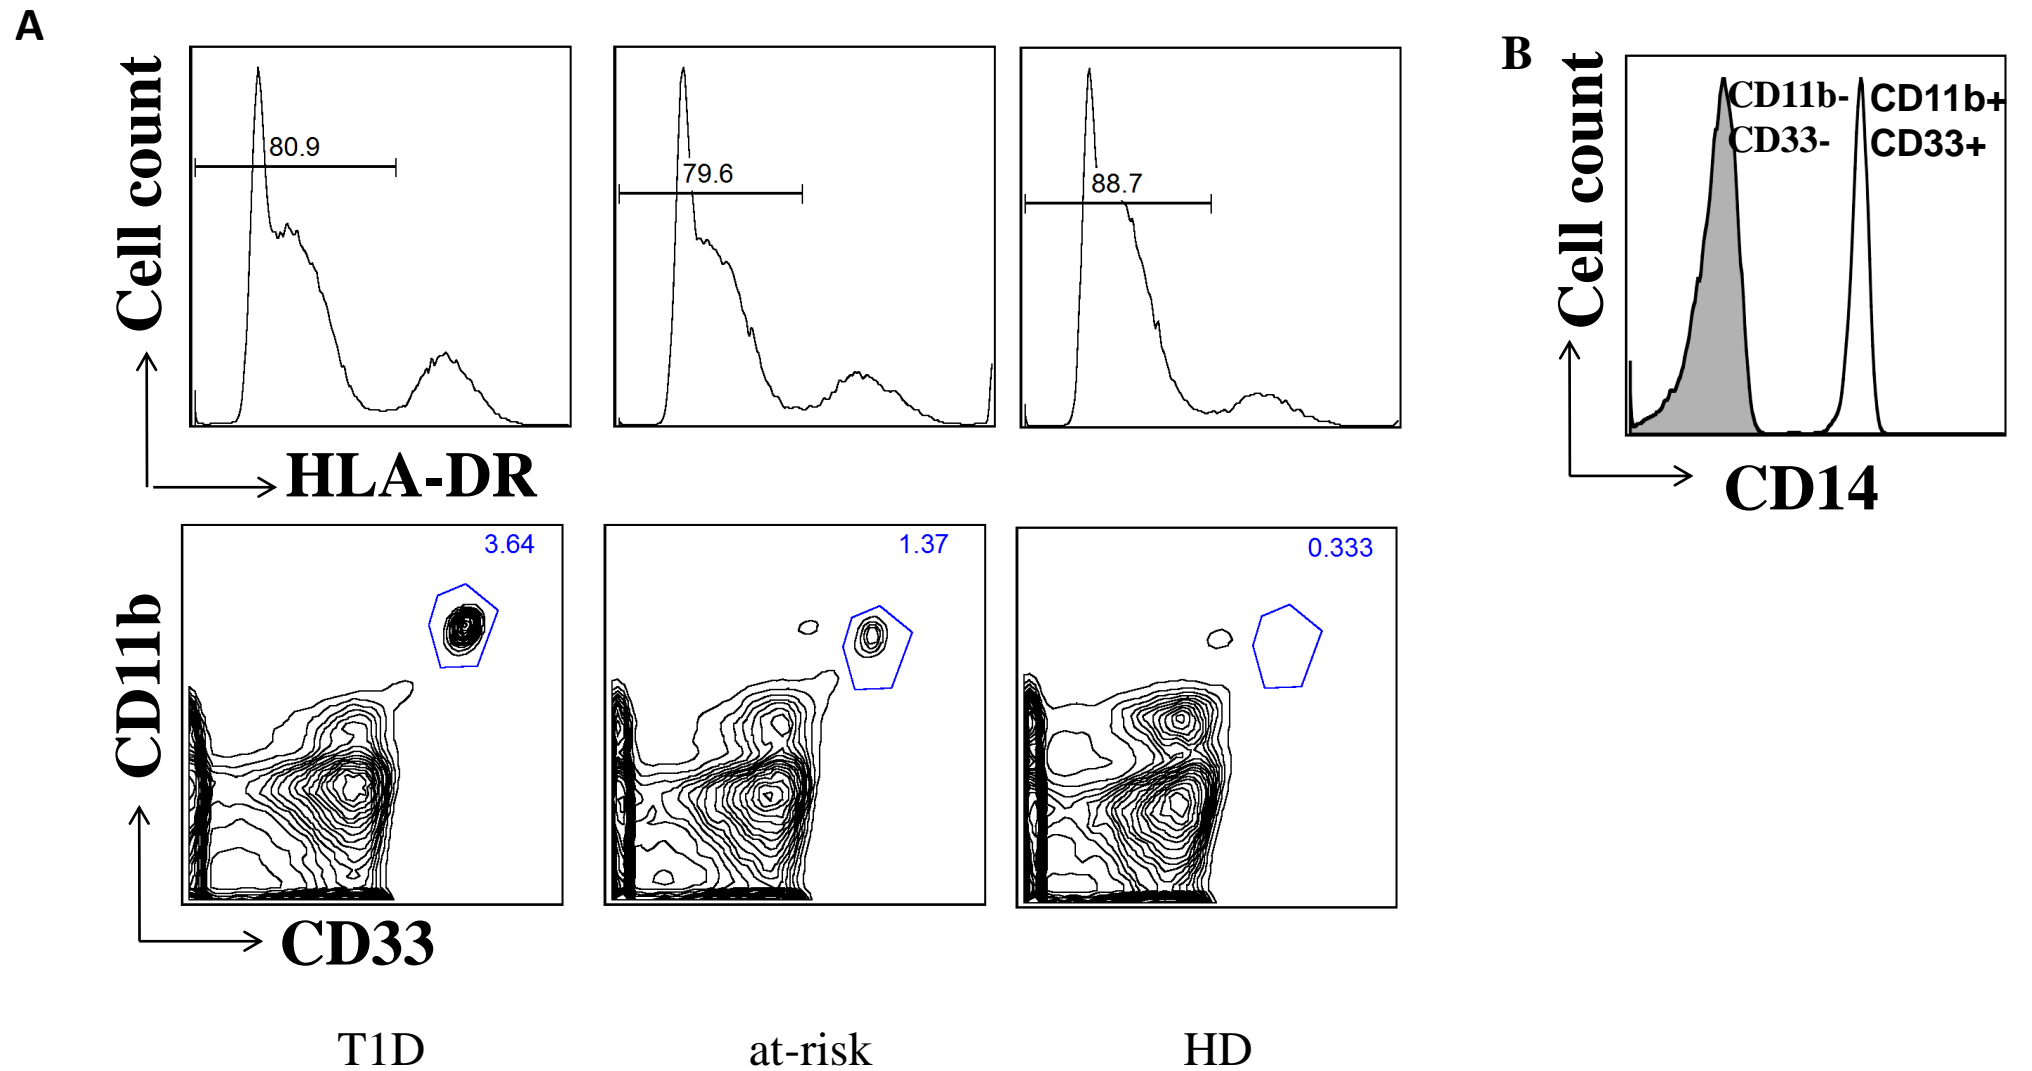

**S1 Fig. The gating strategy of M-MDSC.** (A) Flow cytometry plots representing gating strategy of M-MDSC (CD11b<sup>+</sup>CD33<sup>+</sup> cells) gated on HLA-DR<sup>neg/low</sup> cells from the PBMC of T1D patient, their at-risk relatives and healthy donors (HD). (B) Representative flow plot of CD14 expression in CD11b<sup>+</sup> CD33<sup>+</sup> compared to CD11b<sup>-</sup>CD33<sup>-</sup> cells.
